# Supplementary material for: Structural and electrical properties of layered perovskite type Pr2Ti2O7: experimental and theoretical investigations
Source: Royal Society of Chemistry journal article supplement (doi:10.1039/c5tc00242g), 2015-01-01

# Structure and electrical properties of layered perovskite type $\text{Pr}_2\text{Ti}_2\text{O}_7$ : Experimental and theoretical investigations

Sadequa J. Patwe,<sup>1</sup> Vasundhara Katari,<sup>1</sup> Nilesh P. Salke,<sup>2</sup> Sudhanshu K. Deshpande,<sup>3</sup> Rekha Rao,<sup>2</sup>  
Mayanak K. Gupta,<sup>2</sup> Ranjan Mittal,<sup>2</sup> S. Nagabhusan Achary,<sup>1</sup> \* and Avesh K. Tyagi<sup>1</sup> \*

## Supplementary Information

- SI-I:** Rietveld refinement plots of powder XRD data in different structural models.
- SI-II:** Calculated structural parameters of different model structures PTO. Parameters obtained by Rietveld refinements are included in each Table.
- SI-III:** Variation of energy (energy/formula unit) of PTO in different model structures with molar volume.
- SI-IV:** *UV-Vis* Diffuse reflectance spectrum of PTO.
- SI-V:** DSC traces of PTO.
- SI-VI:** Rietveld refinement plot of powder XRD data of PTO recorded at 1473 K.
- SI-VII:** Raman spectra of PTO recorded at different excitation wavelengths.
- SI-VIII:** SEM images of sintered PTO pellet (Left column: Top surface; right column: Fractured surface).
- SI-IX:** Typical fittings of  $\epsilon''$  of PTO with Havriliak-Negami (H-N) model.

SI-I: Rietveld refinement plots of powder XRD data in different structural models.

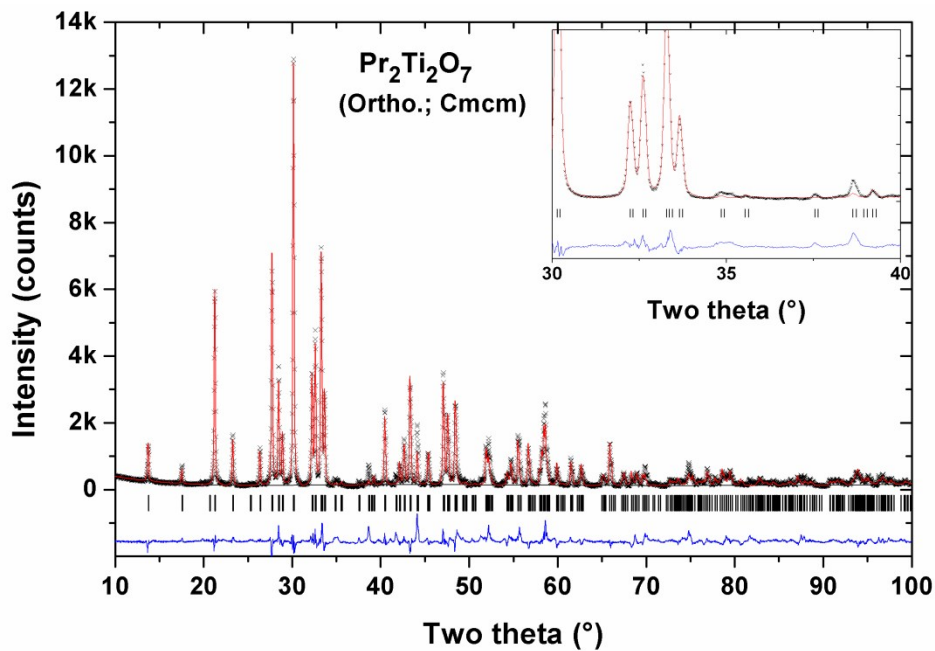

(a). Orthorhombic,  $\text{Cmcm}$

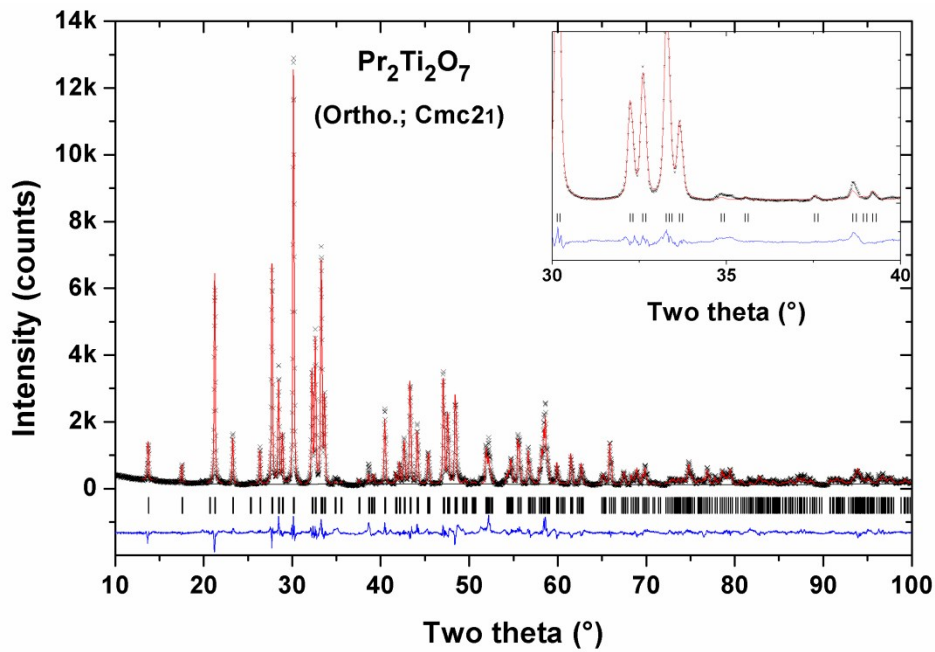

(b). Orthorhombic,  $\text{Cmc}2_1$

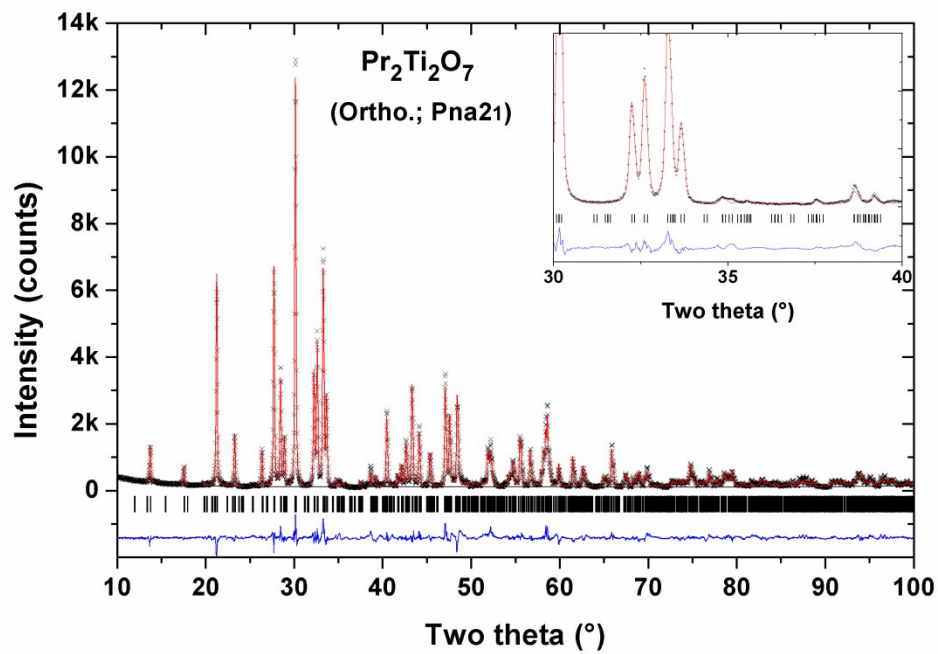

(c). Orthorhombic,  $Pna2_1$

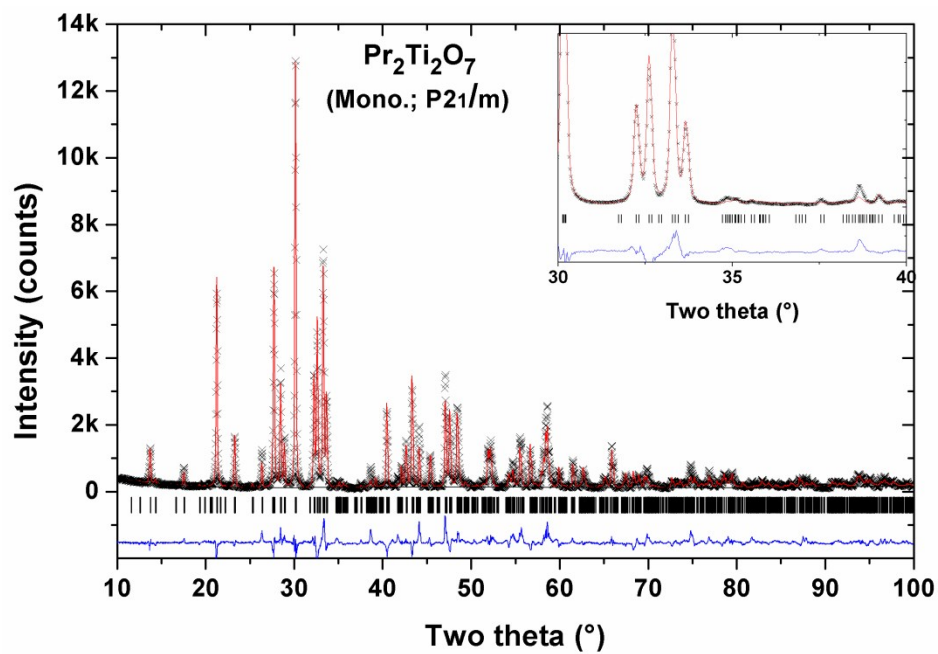

(d). Monoclinic,  $P2_1/m$

SI-II. Calculated structural parameters of different model structures PTO. Parameters obtained by Rietveld refinements are included in each Table.

(a). Orthorhombic (Cmcm)

| Atoms | Wyc | x   | y           | z          | Uiso       | Occ. |
|-------|-----|-----|-------------|------------|------------|------|
| Pr1   | 4   | 0   | 0.44646(8)  | 0.75       | 0.0348(8)  | 1    |
|       |     | 0   | 0.44863     | 0.75       |            |      |
| Pr2   | 4   | 0   | 0.29895(10) | 0.25       | 0.0471(10) | 1    |
|       |     | 0   | 0.28652     | 0.25       |            |      |
| Ti1   | 4   | 0.5 | 0.44075(20) | 0.25       | 0.01052    | 1    |
|       |     | 0   | 0.44277     | 0.25       |            |      |
| Ti2   | 4   | 0.5 | 0.33760(20) | 0.75       | 0.01025    | 1    |
|       |     | 0   | 0.34131     | 0.75       |            |      |
| O1    | 4   | 0.5 | 0.5         | 0.5        | 0.1011(35) | 1    |
|       |     | 0.5 | 0.5         | 0.5        |            |      |
| O2    | 4   | 0   | 0.4532(9)   | 0.25       | 0.1011(35) | 1    |
|       |     | 0   | 0.45686     | 0.25       |            |      |
| O3    | 4   | 0   | 0.3476(8)   | 0.75       | 0.1011(35) | 1    |
|       |     | 0   | 0.35237     | 0.75       |            |      |
| O4    | 8   | 0.5 | 0.3986(4)   | 0.9831(21) | 0.1011(35) | 1    |
|       |     | 0.5 | 0.30014     | 0.98939    |            |      |
| O5    | 8   | 0.5 | 0.2907(5)   | 0.9797(22) | 0.1011(35) | 1    |
|       |     | 0.5 | 0.28914     | 0.98858    |            |      |

Space Group: Cmcm

a = 3.8834(2), b = 25.8274(15), c = 5.5236(3), V = 554.01(5)

a = 3.86719, b = 26.51346, c = 5.62100

(b). Orthorhombic (Cmc2<sub>1</sub>)

| Atoms | Wyc | x   | y           | z          | Uiso       | Occ. |
|-------|-----|-----|-------------|------------|------------|------|
| Pr1   | 4   | 0   | 0.44627(7)  | 0.7536(13) | 0.0261(6)  | 1    |
|       |     | 0   | 0.4536      | 0.7107     |            |      |
| Pr2   | 4   | 0   | 0.29813(9)  | 0.1888(14) | 0.0428(9)  | 1    |
|       |     | 0   | 0.2981      | 0.1438     |            |      |
| Ti1   | 4   | 0.5 | 0.43839(18) | 0.2487(18) | 0.0119(16) | 1    |
|       |     | 0.5 | 0.4324      | 0.2385     |            |      |
| Ti2   | 4   | 0.5 | 0.33754(18) | 0.7185(16) | 0.0139(17) | 1    |
|       |     | 0.5 | 0.3364      | 0.6950     |            |      |
| O1    | 4   | 0.5 | 0.5114(7)   | 0.469(4)   | 0.0448(25) | 1    |
|       |     | 0.5 | 0.5186      | 0.4888     |            |      |
| O2    | 4   | 0.5 | 0.4112(5)   | 0.5615(24) | 0.0448(25) | 1    |
|       |     | 0.5 | 0.4091      | 0.5626     |            |      |
| O3    | 4   | 0.5 | 0.2894(8)   | 0.493(4)   | 0.0448(25) | 1    |
|       |     | 0.5 | 0.2985      | 0.4350     |            |      |
| O4    | 4   | 0   | 0.4518(6)   | 0.226(7)   | 0.0448(25) | 1    |
|       |     | 0   | 0.4508      | 0.2910     |            |      |
| O5    | 4   | 0   | 0.3446(6)   | 0.651(4)   | 0.0448(25) | 1    |
|       |     | 0   | 0.3511      | 0.7618     |            |      |
| O6    | 4   | 0.5 | 0.3858(7)   | 0.0483(26) | 0.0448(25) | 1    |
|       |     | 0.5 | 0.3719      | 0.0925     |            |      |
| O7    | 4   | 0.5 | 0.2874(9)   | 0.955(4)   | 0.0448(25) | 1    |
|       |     | 0.5 | 0.2784      | 0.8948     |            |      |

$a = 3.85753(7)$ ,  $b = 25.7195(5)$ ,  $c = 5.48771(12)$ ,  $V = 544.456$

$a = 3.78373$ ,  $b = 25.81822$ ,  $c = 5.87300$

(c). Orthorhombic (Pna2<sub>1</sub>)

| Atoms | Wyc. |                       |                      |                       |            |
|-------|------|-----------------------|----------------------|-----------------------|------------|
| Ti1   | 4    | 0.09082(26)<br>0.0900 | 0.1311(11)<br>0.1173 | 0.791(5)<br>0.7924    | 0.02798    |
| Ti2   | 4    | 0.18646(27)<br>0.1900 | 0.1174(12)<br>0.1720 | 0.2643(11)<br>0.2653  | 0.02798    |
| Ti3   | 4    | 0.31069(25)<br>0.3109 | 0.1219(12)<br>0.1232 | 0.7519(11)<br>0.7632  | 0.02798    |
| Ti4   | 4    | 0.41469(26)<br>0.4126 | 0.1250(12)<br>0.1288 | 0.2800(12)<br>0.2998  | 0.02798    |
| La1   | 4    | 0.05189(13)<br>0.5594 | 0.3756(16)<br>0.3805 | 0.2926(8)<br>0.2913   | 0.0411(11) |
| La2   | 4    | 0.19681(12)<br>0.2056 | 0.3777(12)<br>0.3749 | 0.7540(9)<br>0.7605   | 0.0186(7)  |
| La3   | 4    | 0.30401(13)<br>0.3109 | 0.3773(13)<br>0.3767 | 0.2480(9)<br>0.2489   | 0.0296(9)  |
| La4   | 4    | 0.45597(14)<br>0.4644 | 0.3781(14)<br>0.3722 | 0.8346(7)<br>0.8621   | 0.0351(10) |
| O1    | 4    | 0.0435(7)<br>0.0358   | 0.156(6)<br>0.1484   | 0.5465(14)<br>0.5755  | 0.0279(22) |
| O2    | 4    | 0.0370(6)<br>0.0471   | 0.093(5)<br>0.1018   | -0.0452(16)<br>0.0601 | 0.0279(22) |
| O3    | 4    | 0.0945(10)<br>0.0970  | 0.3692(12)<br>0.3761 | 0.8782(17)<br>0.8561  | 0.0279(22) |
| O4    | 4    | 0.1286(6)<br>0.1359   | 0.228(27)<br>0.1854  | 0.4388(13)<br>0.4598  | 0.0279(22) |
| O5    | 4    | 0.1636(5)<br>0.1587   | 0.126(8)<br>0.1023   | 0.9388(14)<br>0.9463  | 0.0279(22) |
| O6    | 4    | 0.2100(8)<br>0.2040   | 0.3475(12)<br>0.3753 | 0.2568(18)<br>0.1727  | 0.0279(22) |
| O7    | 4    | 0.2366(5)<br>0.2397   | 0.154(5)<br>0.1644   | 0.5282(16)<br>0.5202  | 0.0279(22) |
| O8    | 4    | 0.2555(5)<br>0.2605   | 0.117(8)<br>0.0868   | 0.0200(16)<br>0.0201  | 0.0279(22) |
| O9    | 4    | 0.3072(10)<br>0.3048  | 0.3700(12)<br>0.3755 | 0.8560(17)<br>0.8162  | 0.0279(22) |
| O10   | 4    | 0.3463(5)<br>0.3405   | 0.140(7)<br>0.1488   | 0.4491(15)<br>0.4433  | 0.0279(22) |
| O11   | 4    | 0.3594(5)<br>0.3652   | 0.070(4)<br>0.0644   | 0.9633(15)<br>0.9565  | 0.0279(22) |
| O12   | 4    | 0.4120(10)<br>0.4028  | 0.3704(12)<br>0.3751 | 0.3438(18)<br>0.1997  | 0.0279(22) |
| O13   | 4    | 0.4490(8)<br>0.4439   | 0.133(9)<br>0.1548   | 0.5569(15)<br>0.5849  | 0.0279(22) |
| O14   | 4    | 0.4671(6)<br>0.4703   | 0.111(8)<br>0.1050   | 0.0402(16)<br>0.0924  | 0.0279(22) |

$a = 25.7197(4)$ ,  $b = 7.71509(12)$ ,  $c = 5.48767(9)$ ,  $V = 1088.919(29)$

$a = 26.31000$ ,  $b = 7.75500$ ,  $c = 5.56000$

(d). Monoclinic ( $P2_1/m$ )

| Atoms | Wyc | x                      | y                     | z                     | Uiso       | Occ. |
|-------|-----|------------------------|-----------------------|-----------------------|------------|------|
| Pr1   | 2   | 0.7324(14)<br>0.7269   | 0.25<br>0.25          | 0.88633(35)<br>0.8909 | 0.0381(15) | 1    |
| Pr1a  | 2   | 0.2323(12)<br>0.2269   | 0.25<br>0.25          | 0.89985(33)<br>0.8909 | 0.0235(12) | 1    |
| Pr2   | 2   | 0.8448(15)<br>0.8555   | 0.25<br>0.25          | 0.4143(4)<br>0.4270   | 0.0707(22) | 1    |
| Pr2a  | 2   | 0.3478(13)<br>0.3555   | 0.25<br>0.25          | 0.39153(33)<br>0.4270 | 0.0264(12) | 1    |
| Ti1   | 2   | 0.5258(17)<br>0.5264   | 0.25<br>0.25          | 0.1146(7)<br>0.1104   | 0.03523    | 1    |
| Ti1a  | 2   | 0.0278(17)<br>0.0264 0 | 0.25<br>0.25          | 0.1151(7)<br>0.1104   | 0.03523    | 1    |
| Ti2   | 2   | 0.9242(17)<br>0.9313   | 0.25<br>0.25          | 0.6763(8)<br>0.6826   | 0.03523    | 1    |
| Ti2a  | 2   | 0.4272(17)<br>0.4313   | 0.25<br>0.25          | 0.6802(8)<br>0.6826   | 0.03523    | 1    |
| O3    | 2   | 0<br>0                 | 0<br>0                | 0<br>0                | 0.0854(35) | 1    |
| O3a   | 2   | 0.5<br>0.5             | 0<br>0                | 0<br>0                | 0.0854(35) | 1    |
| O4    | 2   | 0.7796(18)<br>0.7731   | 0.25<br>0.25          | 0.1288(29)<br>0.0921  | 0.0854(35) | 1    |
| O4a   | 2   | 0.2661(19)<br>0.2731   | 0.25<br>0.25          | 0.0733(24)<br>0.0921  | 0.0854(35) | 1    |
| O5    | 2   | 0.6739(18)<br>0.6735   | 0.25<br>0.25          | 0.6758(29)<br>0.6952  | 0.0854(35) | 1    |
| O5a   | 2   | 0.1796(18)<br>0.1735   | 0.25<br>0.25          | 0.6929(29)<br>0.6952  | 0.0854(35) | 1    |
| O6    | 4   | 0.430(5)<br>0.4487     | 1.0308(23)<br>1.0159  | 0.8115(10)<br>0.7996  | 0.0854(35) | 1    |
| O6a   | 4   | 0.8906(33)<br>0.9487   | 0.9601(26)<br>0.9841  | 0.7790(11)<br>0.7996  | 0.0854(35) | 1    |
| O7    | 4   | 0.389(7)<br>0.3950     | 0.0378(32)<br>0.00676 | 0.5856(13)<br>0.5783  | 0.0854(35) | 1    |
| O7a   | 4   | 0.893(7)<br>0.8950     | 0.0185(30)<br>0.0068  | 0.5930(15)<br>0.5783  | 0.0854(35) | 1    |

$a = 7.71461(21)$ ,  $b = 5.48743(12)$ ,  $c = 13.0036(4)$ ,  $\beta = 98.531(7)$ ,  $V = 544.397(23)$

$a = 7.866463$ ,  $b = 5.544969$ ,  $c = 13.345535$ ,  $\beta = 98.52855$

SI-III. Variation of energy (energy/formula unit) of PTO in different model structures with molar volume.

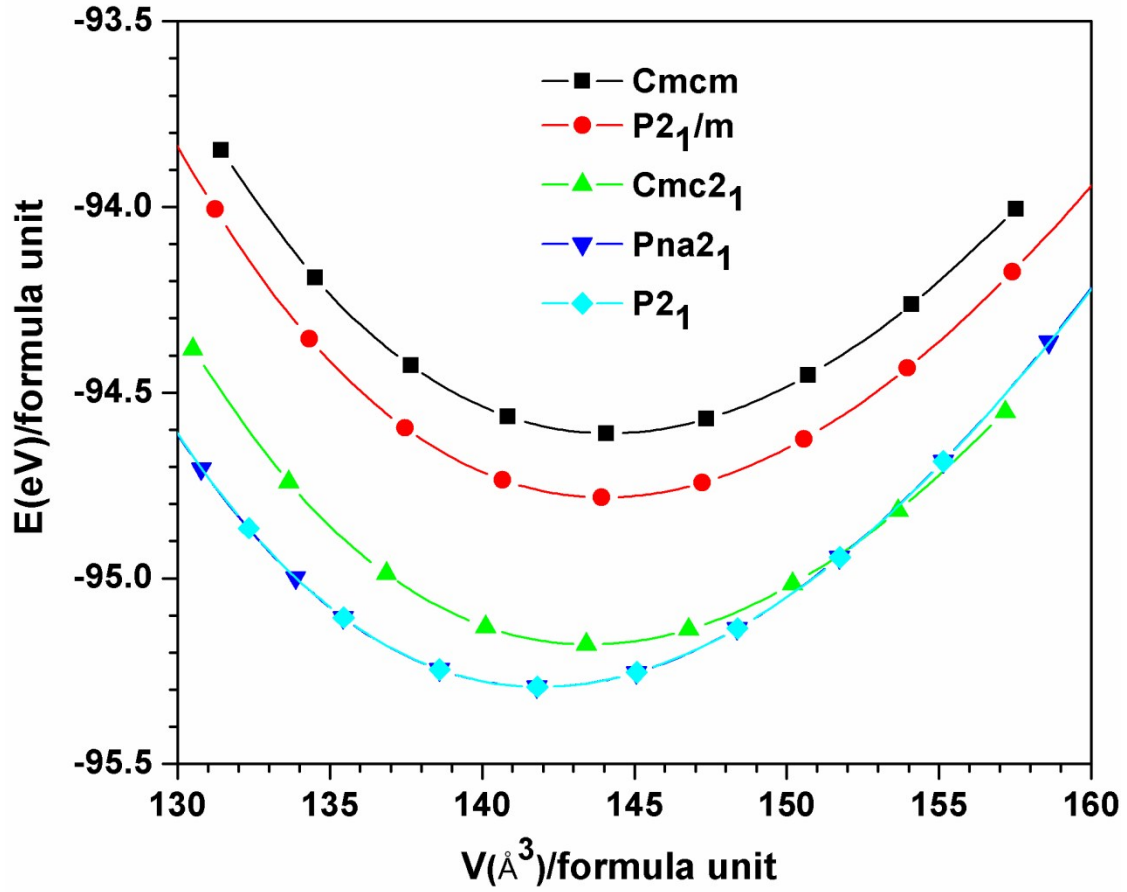



SI-IV. *UV-Vis* Diffuse reflectance spectrum of PTO.

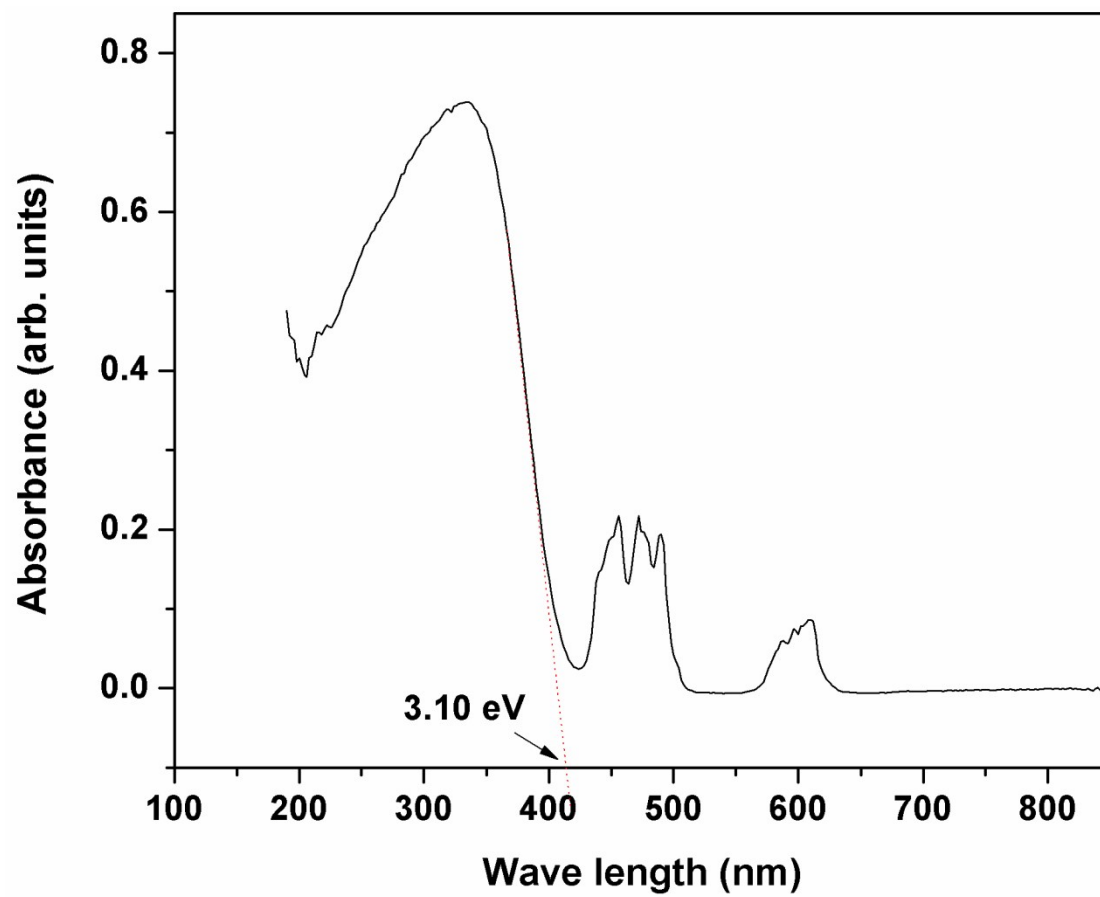

SI-V. DSC traces of PTO.

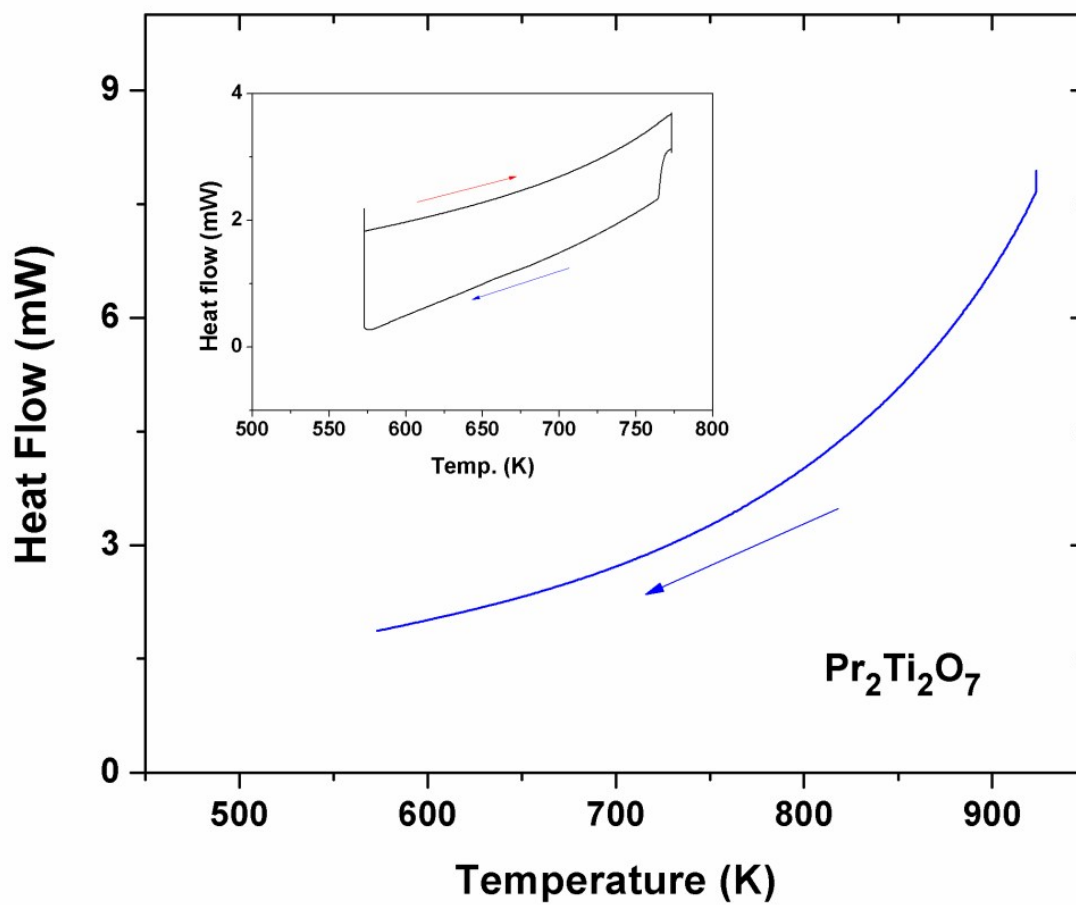

SI-VI. Rietveld refinement plot of powder XRD data of PTO recorded at 1473 K.

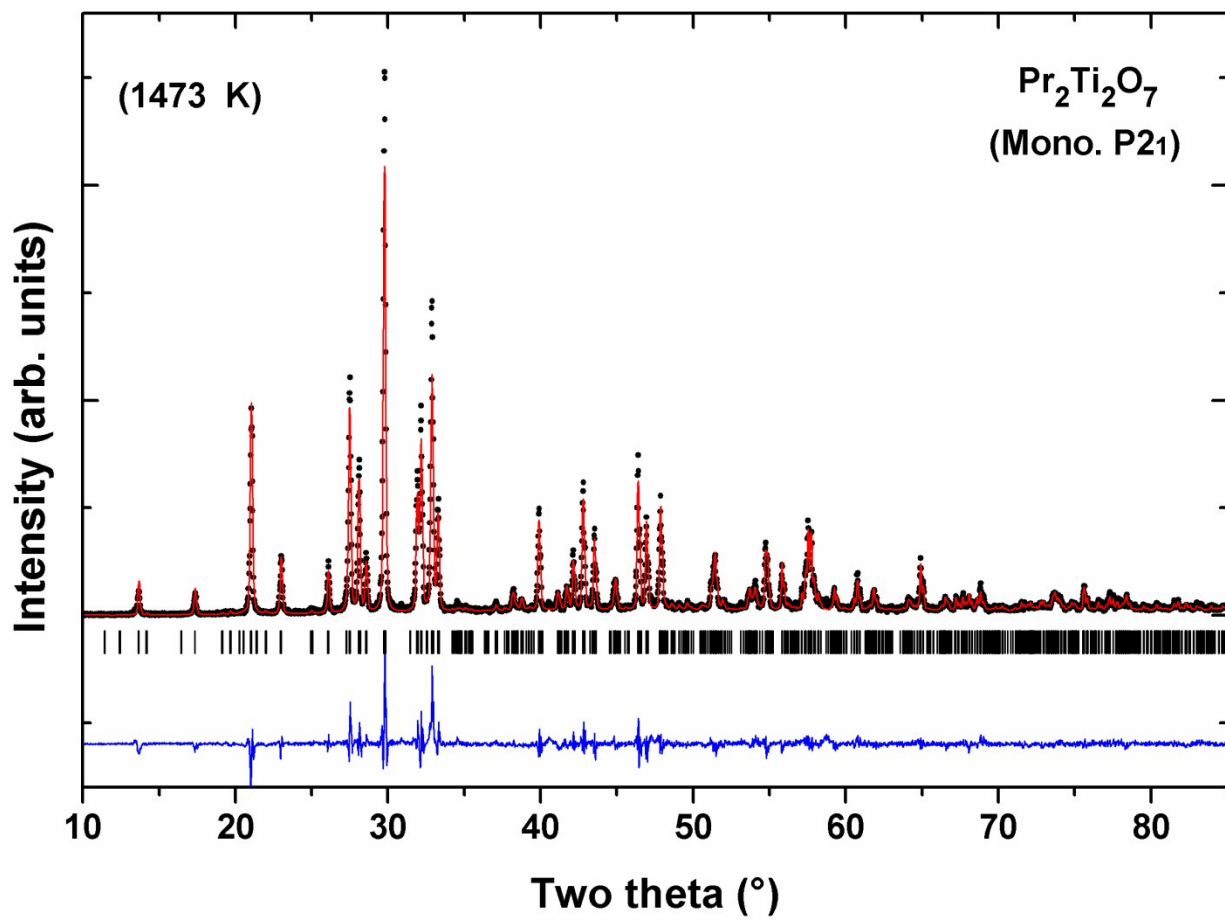

SI-VII. Raman spectra of PTO recorded at different excitation wavelengths.

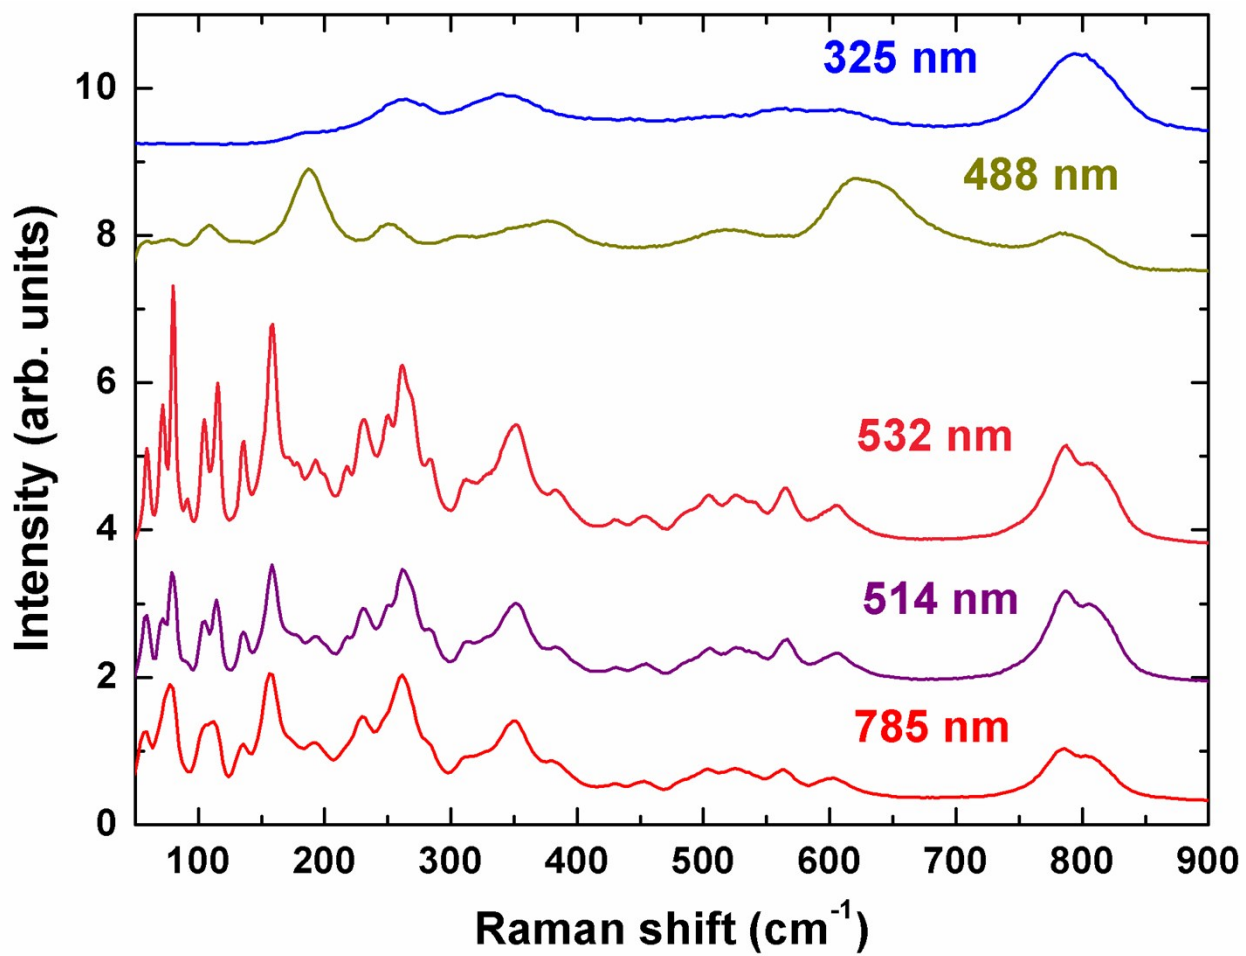

SI-VIII. SEM images of sintered PTO pellet (Left column: Top surface; right column: Fractured surface).

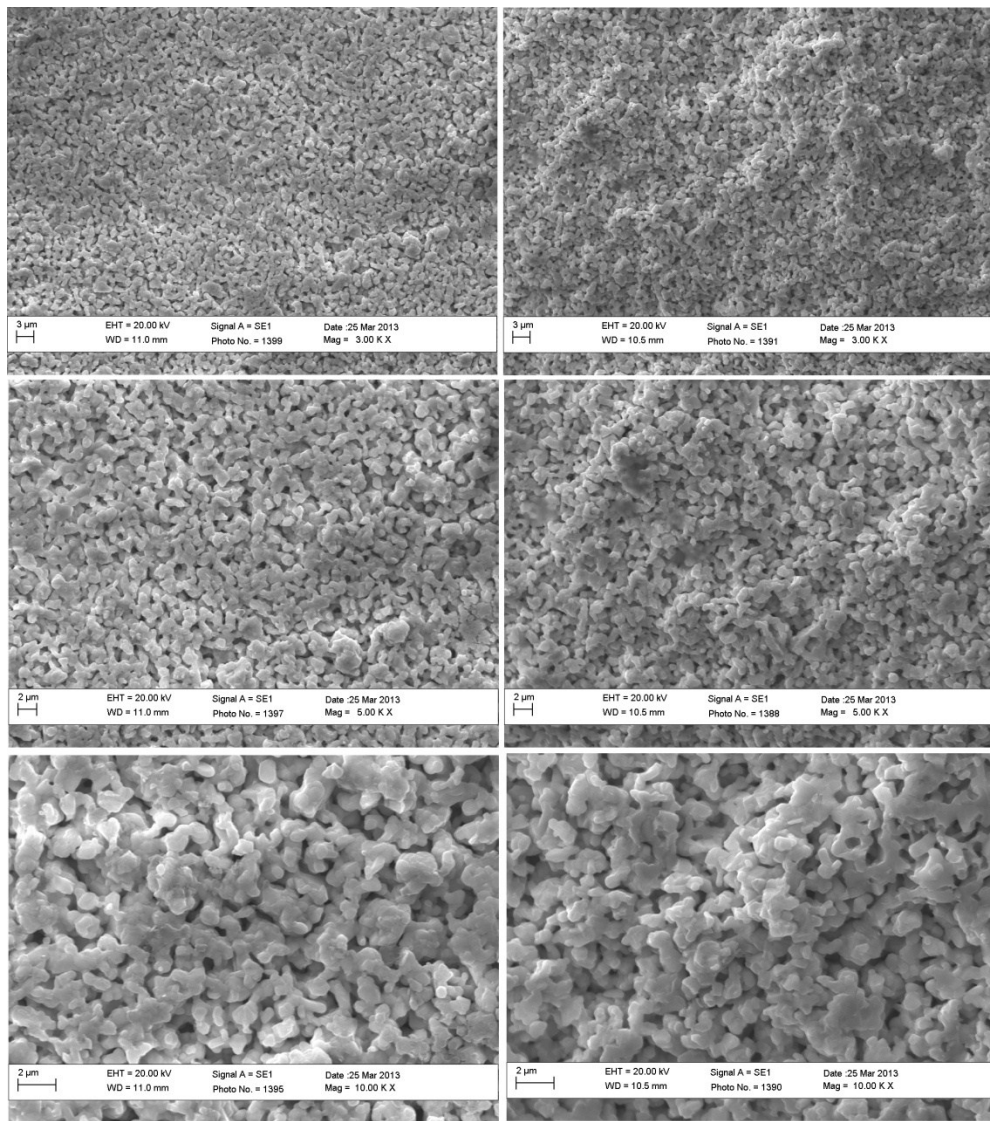

SI-IX. Typical fittings of  $\epsilon''$  of PTO with Havriliak-Negami (H-N) model.

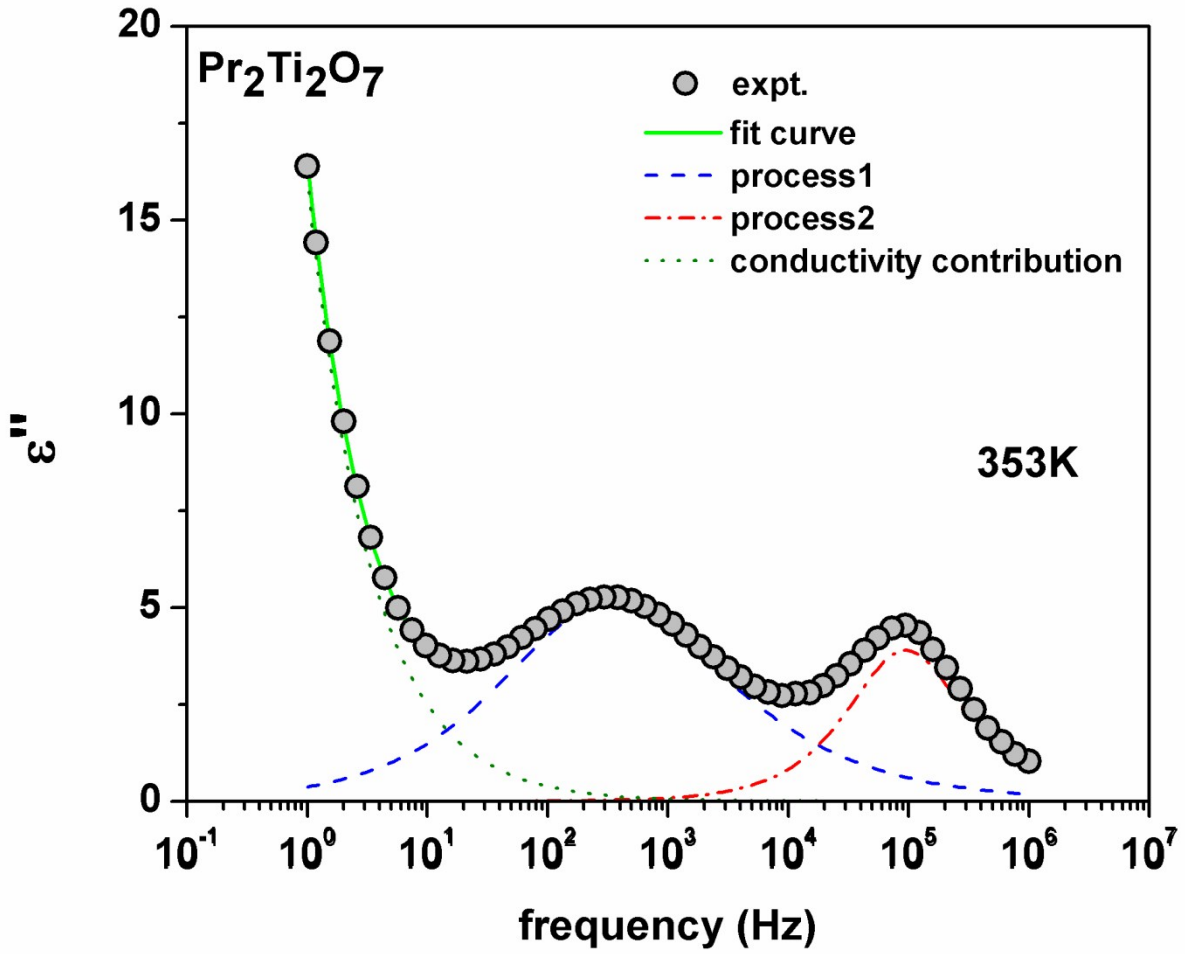

Supplement: c5tc00242g1.pdf [file c5tc00242g1.pdf]
